# Supplementary material for: Regulation of Bile Acid Synthesis by Fat-soluble Vitamins A and D
Source: PubMed Central journal article supplement — J Biol Chem. 2010 Mar 16;285(19):14486–94. doi: 10.1074/jbc.M110.116004 (PMC2863217; doi:10.1074/jbc.m110.116004), 2010-03-16
Supplement: supp_M110.116004_jbc.M110.116004-1.pdf [file supp_M110.116004_jbc.M110.116004-1.pdf]

## SUPPLEMENTAL DATA

SUPPLEMENTAL FIG. 1. **Bile acid metabolism is dysregulated in VDR<sup>-/-</sup> mice.** *A-C*, Hepatic mRNA expression of nuclear receptors that regulate *Cyp7a1* transcription (*A*), bile acid transporters (*B*), and genes involved in the alternative bile acid synthesis pathway (*C*). VDR expression in the liver was undetectable in either genotype (data not shown). *D*, Intestinal mRNA expression of bile acid transporters and the xenobiotic receptor, *Pxr*. See Figure 1 for description of experiment and data analysis.

SUPPLEMENTAL FIG. 2. **VDR induces *Fgf15* to suppress *Cyp7a1*.** Intestinal mRNA expression of bile acid transporters and additional genes described in the text. See Figure 2A for description of experiment and data analysis.

SUPPLEMENTAL TABLE 1. **QPCR primer sequences.**

SUPPLEMENTAL TABLE 2. **QPCR primer sequences for ChIP analysis of the *Fgf15* gene locus.**

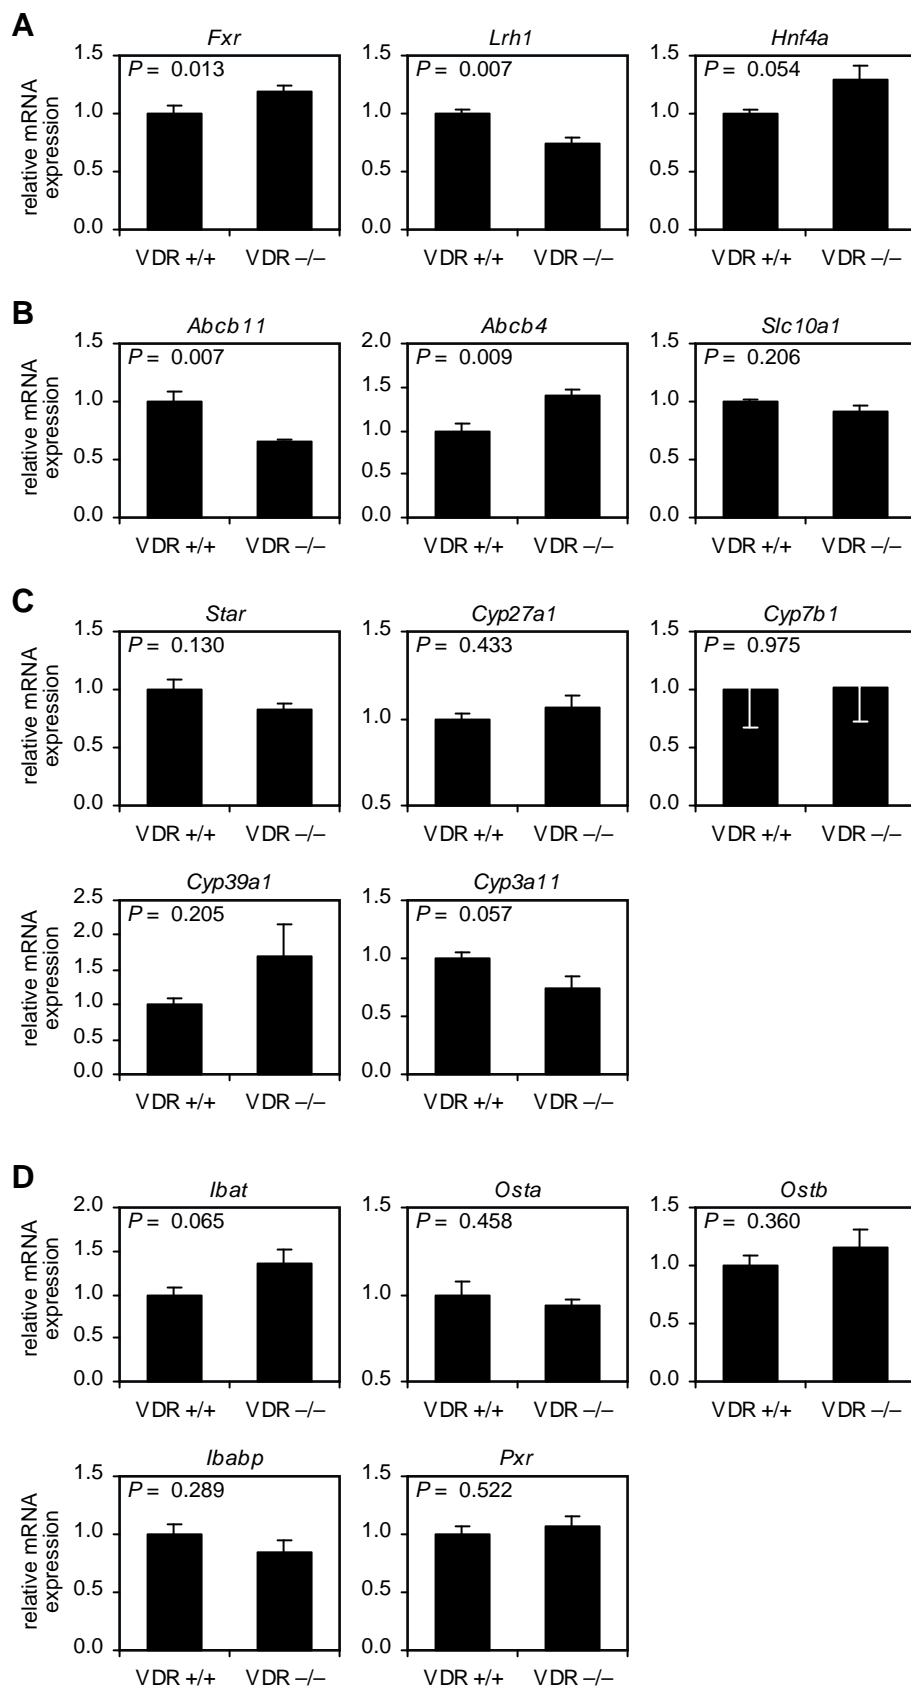

Supplemental Figure 1  
Schmidt et al.

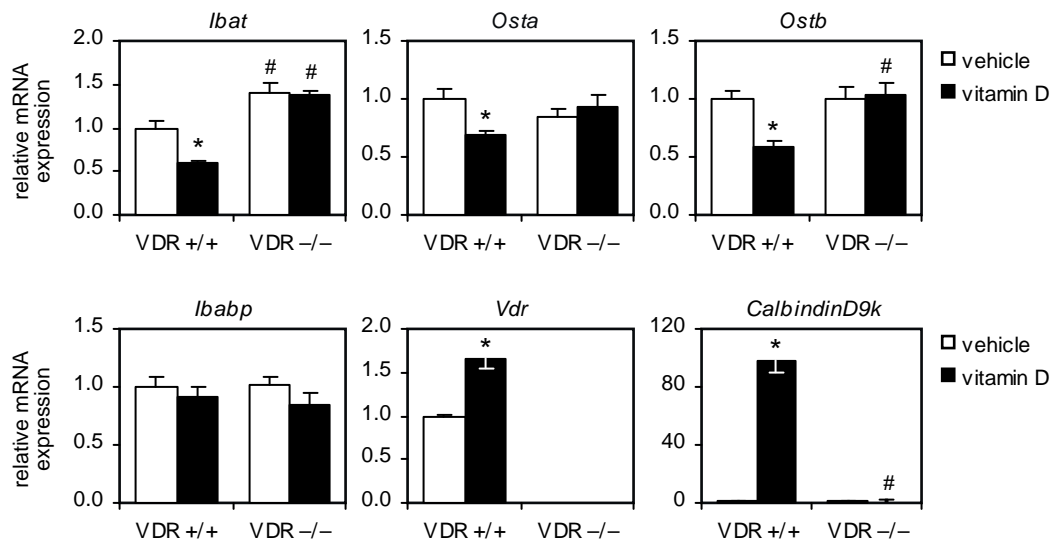

Supplemental Figure 2  
Schmidt et al.

**Supplemental Table 1**  
 QPCR primer sequences

|                             |           |                             |                          |
|-----------------------------|-----------|-----------------------------|--------------------------|
| <i>Abcb1 1 (Bsep)</i>       | NM_021022 | aaagctacatctgccttagacacagaa | caatacaggtccgaccctctct   |
| <i>Abcb4 (Mdr2)</i>         | NM_008830 | cttgaggcagcgagaaatg         | ggttgctgatgctgcctag      |
| <i>Cyp27a1</i>              | NM_024264 | gcctcacctatgggactttca       | tcaaaagcctgacgcagatg     |
| <i>Cyp39a1</i>              | NM_018887 | tggccaatgctcctcctat         | tgtggatatacgggatgagaca   |
| <i>Cyp3a11</i>              | NM_007818 | aaactgcaggatgagatcgatga     | tccaggatattccatctccatcac |
| <i>Cyp7a1</i>               | NM_007824 | agcaactaaaacactgccagtacta   | gtccggatattcaaggatgca    |
| <i>Cyp7b1</i>               | NM_007825 | tagccctcttccctccactcata     | gaaccgatcgaacctaaattcct  |
| <i>Cyp8b1</i>               | NM_010012 | gccttcaagatgatcggttcct      | gatcttcttgcccgcactttaga  |
| <i>Fabp-6 (Ibapb)</i>       | NM_008375 | tggagagtgagaagaattacgatgagt | tttcaatcacgtctcctggaa    |
| <i>Fgf15</i>                | NM_008003 | acgggctgattcgctactc         | tgtagcctaaacagtcatttccct |
| <i>Hnf4a</i>                | NM_008261 | accaagaggtccatggtgttt       | gtgccgagggacgatgtag      |
| <i>Il1b (Il-1β)</i>         | NM_008361 | tgacggaccctcaaaagatg        | tggacagcccagggtcaaaag    |
| <i>Nr0b2 (Shp)</i>          | NM_011850 | cgatcctcttcaaccagatg        | agggctccaagacttcacaca    |
| <i>Nr1h4 (Fxr)</i>          | NM_009108 | tccggacattcaaccatcac        | tcaactgcacatcccagatctc   |
| <i>Nr1i2 (Pxr)</i>          | NM_010936 | caagggccaatggctacca         | cgggtgatctcgcagggtt      |
| <i>Nr5a2 (Lrh-1)</i>        | NM_030676 | tgggaaggaaaggacaaatcct      | cgagactcaggaggttgttgaa   |
| <i>Osta</i>                 | NM_145932 | aacagaacatgggatccaagtctt    | cagggcgggtcaggatga       |
| <i>Ostb</i>                 | NM_178933 | gacaagcatgttcctcctgaga      | tgtcttgtggctgcttcttctc   |
| <i>S100g (CalbindinD9k)</i> | NM_009789 | gcctcctgaaggcttcaagt        | tccatcgccattcttatcca     |
| <i>Slc10a1 (Ntcp)</i>       | NM_011387 | gaagtccaaaaaggccacactatgt   | acagccacagagaggagaaag    |
| <i>Slc10a2 (Asbt, Ibat)</i> | NM_011388 | tgactcgggaacgatgtg          | ggaataacaagagcaaccagagaa |
| <i>Star</i>                 | NM_011485 | cggagcagagtgggtgcatc        | tgagtttagtcttgaggacttc   |
| <i>Tnf (Tnf-α)</i>          | NM_013693 | ctgaggtcaatctgccccaaagtac   | cttcacagagcaatgactccaaag |
| <i>U36b4</i>                | NM_007475 | cgctcctcgttggagtgaca        | cggtgcgtcagggatg         |
| <i>Vdr</i>                  | NM_008361 | ggcttccacttcaacgctatg       | atgctccgcctgaagaac       |

## Supplemental Table 2

QPCR primer sequences for ChIP analysis of the *Fgf15* gene locus

---

| <b>Amplicon</b> | <b>Forward Primer</b>     | <b>Reverse Primer</b>    |
|-----------------|---------------------------|--------------------------|
| -1569 to -1498  | gtcccatTTTTctaccttgTtcaga | ggccgccataagaacatt       |
| -998 to -927    | accacggagctaggccagta      | cccccaactcctgtatgtg      |
| -704 to -619    | tcaagggcctgatcatcga       | gacttttgagaagggTggactga  |
| -182 to -71     | gctcctcctctgccagatct      | tcagagcatttctcctcctaattg |
| +430 to +510    | tcccttaggaccagaagca       | cccagctccagtctggaagt     |
| +921 to + 991   | ggctaactgctgagtccatt      | aagccaggagaggaggcttt     |
| +1515 to +1570  | ccctgcctggctgaa           | agatacaggcaggagatttgctt  |
| +1932 to + 2002 | agagccttatctgccaaactgtct  | caggctgtgtctgcctaagc     |
| +2381 to +2451  | agcagggTTTTggaaagtTga     | tgtgcaaattctcctggTTTT    |
| +2900 to +2959  | tgggatgagccaacaatctc      | aggcaagaaatccagagttgaag  |
